# Supplementary material for: Influence of Instant Controlled Pressure Drop (DIC) on Allergenic Potential of Tree Nuts
Source: MDPI journal article supplement (doi:10.3390/molecules25071742), 2020-04-10
Supplement: s1 [file s1]

**Figura S3.** SDS-PAGE (4-20%) of pistachio (A) and cashew (B). Excised band proteins for identification are marked in red. (20µg protein/lane)

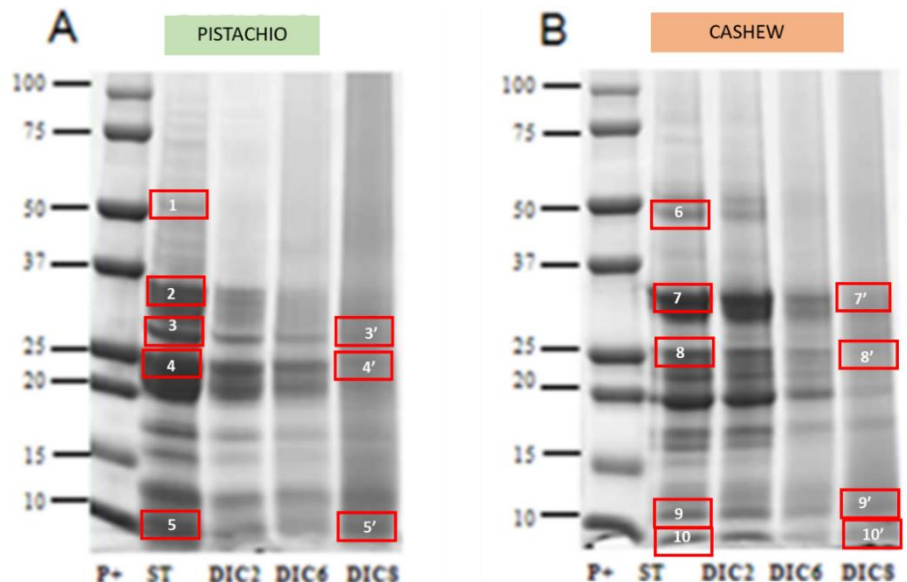

**Table S1.** Proteins separated by SDS-PAGE and identified by MALDI-TOF/TOF. Pistachio and cashew proteins from untreated and DIC8 treated samples (7 bar, 120 sec) identified by MALDI-TOF/TOF (PMF) or (PMF+MS-MS spectra)#

| Band No. | No. access | Protein identification                  | Mascot score* | % Coverage | Mass (Da) | Matched peptides | Ion score |
|----------|------------|-----------------------------------------|---------------|------------|-----------|------------------|-----------|
| 1        | B7P073     | Pis v 2.01 (11S <i>P.vera</i> )         | 215           | 51         | 56716     | 22               |           |
| 1        | B7SLJ1     | Pis v 5.01/ (11S <i>P.vera</i> )        | 89            | 30         | 53896     | 13               |           |
| 2        | B4X640     | Pis v 3.01 (7S <i>P.vera</i> )          | 94            | 26         | 60306     | 15               |           |
| 2        | B7SLJ1     | Pis v 5.01 (11S <i>P.vera</i> )         | 54            | 18         | 53896     | 9                |           |
| 3        | B7P073     | Pis v 2.01 (11S <i>P.vera</i> )         | 122           | 37         | 56716     | 14               |           |
| 4        | B7P073     | Pis v 2.01 (11S <i>P.vera</i> )         | 159           | 45         | 56716     | 17               |           |
| 5        | B7P072     | Pis v 1 (2S <i>P.vera</i> )             | 81            | 30         | 17792     | 9                |           |
| 3'       | B7P074     | Pis v 2.02 /(11S <i>P.vera</i> )        | 103           | 38         | 53550     | 14               |           |
| 4'       | B7P073     | Pis v 2.01 (11S <i>P.vera</i> )         | 124           | 34         | 56716     | 15               |           |
| 5'#      | B7P072     | Pis v 1 (2S <i>P.vera</i> )             | 116           | 22         | 17792     | --               | 74        |
| 6        | Q8GZL6     | Ana o 2.01 (11S <i>A. occidentale</i> ) | 79            | 25         | 52420     | 11               |           |
| 6        | Q8L5L6     | Ana o 1.01 (7S <i>A. occidentale</i> )  | 68            | 26         | 62284     | 13               |           |
| 7        | Q8GZL6     | Ana o 2.01 (11S <i>A. occidentale</i> ) | 79            | 24         | 52420     | 11               |           |
| 8        | Q8GZL6     | Ana o 2.01 (11S <i>A. occidentale</i> ) | 49            | 35         | 52420     | 16               |           |
| 9        | Q8H2B8     | Ana o 3 (2S <i>A. occidentale</i> )     | 59            | 55         | 16781     | 9                |           |
| 10#      | Q8H2B8     | Ana o 3 (2S <i>A. occidentale</i> )     | 122           | 36         | 16781     | --               | 61        |
| 7'       | Q8GZL6     | Ana o 2.01 (11S <i>A. occidentale</i> ) | 140           | 37         | 52420     | 18               |           |
| 8'       | Q8GZL6     | Ana o 2.01 (11S <i>A. occidentale</i> ) | 150           | 34         | 52420     | 19               |           |
| 9'       | Q8GZL6     | Ana o 2.01 (11S <i>A. occidentale</i> ) | 62            | 19         | 52,420    | 10               |           |
| 10'      | Q8H2B8     | Ana o 3 (2S <i>A. occidentale</i> )     | 55            | 36         | 16,335    | 7                |           |

\* Protein scores greater than 49 are significant ( $P < 0.05$ ). Protein score is  $-10 \cdot \log(P)$ , where P is the probability that the observed match is a random event.
