# Supplementary material for: Influence of Instant Controlled Pressure Drop (DIC) on Allergenic Potential of Tree Nuts
Source: MDPI journal article supplement (doi:10.3390/molecules25071742), 2020-04-10

**Figure S1.** IgE immunoblots with individual sera. IgE immunoblot of proteins of pistachio A) and cashew (B) of untreated (control,ST) and DIC treated samples (20µg protein/lane). IgE immunoblots were carried out using individual sera from 11 patients allergic to pistachio and cashew (P1-P11). Lane C represents a negative control serum.

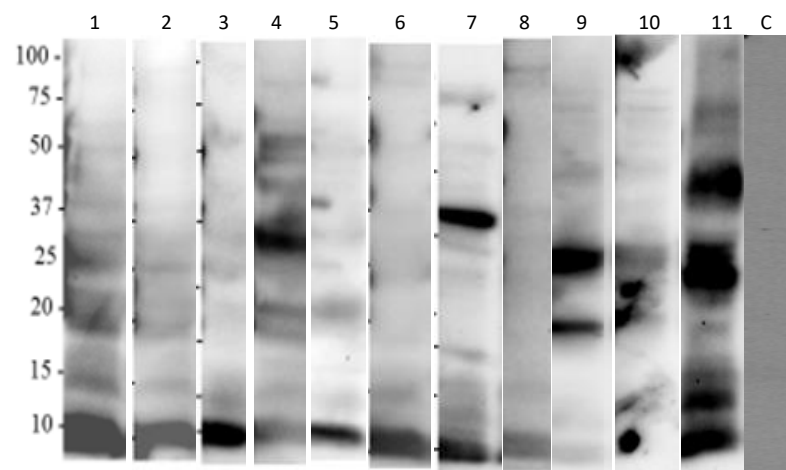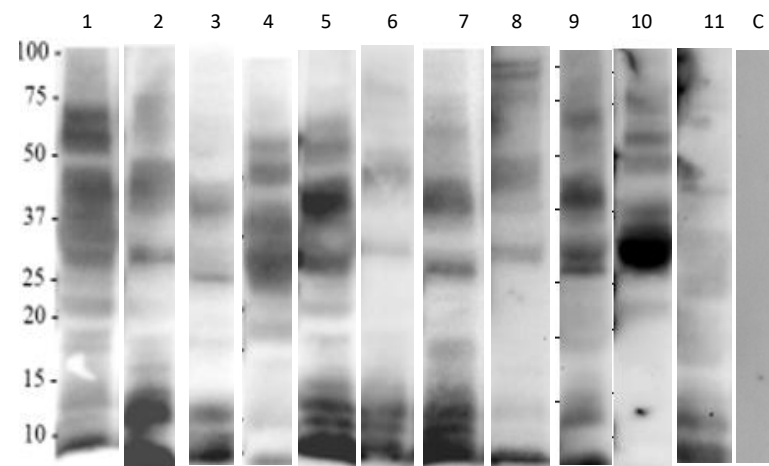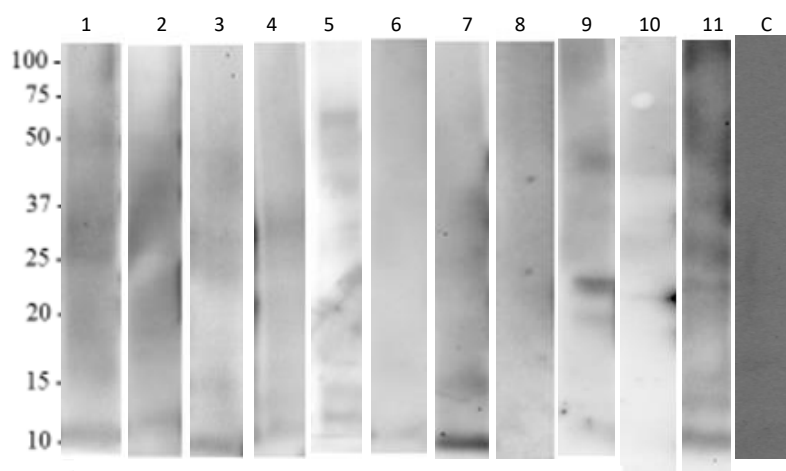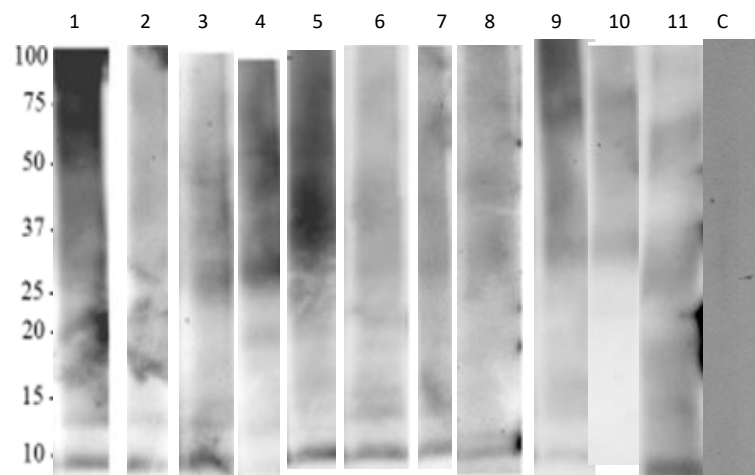

**Figure S2.** IgE immunoreactive protein bands. Percentage of patients that immunoreact with each protein band of pistachio (A) and cashew (B) untreated and treated by DIC 7 bar 120 seconds. Analysis performed with Quantity One Software (BioRad).

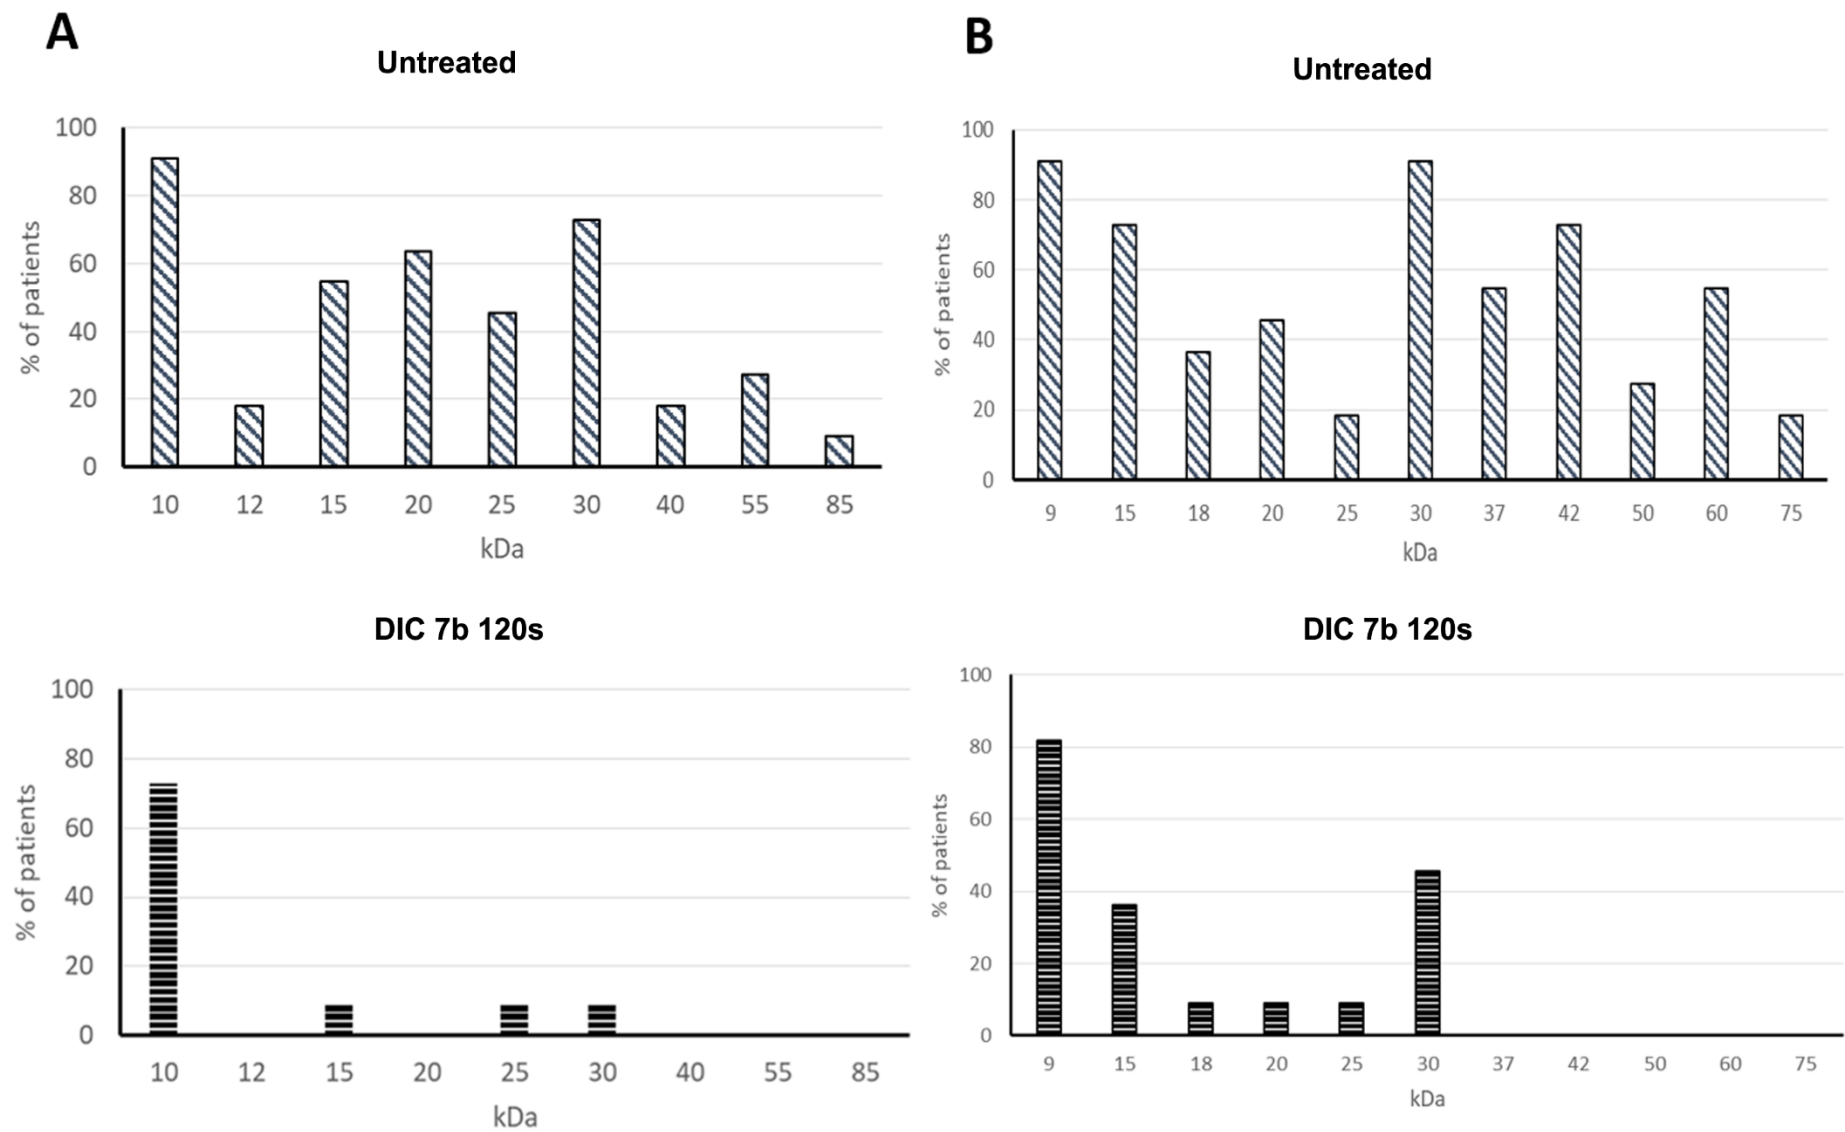

Supplement: s1 [file s1]
